1 **Perinatal outcomes, maternal age, parity and fetal sex – searching for the**  
2 **“optimal” maternal age**

3

4 Šárka Kaňková<sup>1\*</sup>, Jaroslav Flegr<sup>1</sup>, Radim Kuba<sup>1,2</sup>, Pavel Calda<sup>3</sup>

5

6 <sup>1</sup>Department of Philosophy and History of Science, Faculty of Science, Charles University,  
7 Prague, CZ-128 44 Prague 2, Czech Republic

8 <sup>2</sup>Department of 2 Department of Teaching and Didactics of Biology, Faculty of Science, Charles  
9 University, Prague, CZ-128 43 Prague 2, Czech Republic

10 <sup>3</sup>Department of Obstetrics and Gynaecology, General University Hospital and First Faculty of  
11 Medicine, Charles University, Prague, CZ-128 08 Prague 2, Czech Republic

12

13 \*Corresponding author:

14 Tel.:+420 221951821, fax: +420 224919704

15 E-mail: [kankova.sarka@gmail.com](mailto:kankova.sarka@gmail.com)

16

17 Division of Biology, Faculty of Science, Charles University, Prague, Viničná 7, 128 44,  
18 Czech Republic

19

20

21

22

23

24

25

26 **Abstract**

27 **Background.** Maternal age, parity and fetal sex are each known to affect obstetric and birth  
28 outcomes. The objective of the present study was to investigate the influence of the combination  
29 of maternal age, parity and fetal sex on outcomes of pregnancies. The aim of the study was to  
30 analyze the influence of maternal age on perinatal outcomes in both primiparous and multiparous  
31 women with different fetal sex.

32 **Methods.** The cross-sectional study was performed on data from 11,780 women, who have  
33 given birth at the General University Hospital in Prague, Czech Republic between 2008-2012.

34 **Results.** Maternal age significantly ( $P<0.01$ ) influenced pregnancy weight gain, duration of  
35 pregnancy, birth weight and birth length. Primiparous women with female newborns aged  $\leq 19$   
36 had higher rates of preterm delivery than comparable women 20-39 ( $P=0.012$ ). Similarly,  
37 women with male newborns aged  $\geq 40$  had higher rates of preterm delivery than comparable  
38 women 20-39 ( $P=0.003$ ). Women aged  $\leq 24$  expressed higher rates of low birth weight than  
39 women aged  $>24$  ( $P<0.001$ ), regardless of parity and fetal sex. The older ( $\geq 35$ ) primiparous  
40 women with male newborns expressed a higher incidence of macrosomia ( $P=0.021$ ) compared to  
41 other groups of women. The probability of caesarean delivery increased with age ( $P<0.001$ ) and  
42 it was significantly affected by the parity and sex of the newborn with higher rates of caesarean  
43 section in primiparous women as well as in mothers carrying male fetuses.

44 **Conclusions.** Our results indicate that “optimal” maternal age without obstetrics and birth  
45 complications is 25-34 years, older age is associated with increased complications with a male  
46 fetus, especially in primiparous women. Our data suggests that not just the age of women, but the  
47 combination of age, parity, and fetal sex should be taken into consideration during assessment of  
48 health risks of pregnancy.

49

50 **Keywords:** maternal age; fetal sex; parity; macrosomia; preterm delivery; caesarean delivery

## 51 **Introduction**

52 During the last decades, there has been a clear trend in higher-income countries towards  
53 delaying childbirth to later reproductive years. In contrast to this broader population trend,  
54 rates of teenage motherhood have remained relatively stable at around 10–40 births per 1,000  
55 per year [1-3].

56 Several publications have reviewed perinatal outcome either among women of  
57 advanced maternal age [4-10] or among young maternal age [5, 11-14]. Age 35 years or older  
58 in pregnant women was associated with an increased risk of intrauterine fetal death,  
59 pregnancy-induced hypertension, gestational diabetes, delivery by caesarean [8, 9, 15] and  
60 maternal near miss, maternal death and several maternal outcomes [6]. Preterm birth,  
61 gestational diabetes, and preeclampsia were more common among women 40 years or older  
62 [10]. Also, it is well acknowledged that teenage pregnancies are at increased risk for adverse  
63 birth outcomes like stillbirth, preterm birth, neonatal death, and low birth weight. [5, 11-14].

64 Furthermore, most published studies categorized maternal age to analyze the  
65 association. Weng et al. [5] explored nationwide population-based data of over 2 million  
66 births by each year of maternal age to comprehensively analyze the adverse birth outcomes.  
67 The data suggest that the optimal maternal ages to minimize adverse birth outcomes are 26-30  
68 years [5]. Also, fetal sex is known to affect outcomes of pregnancies. Women carrying male  
69 fetuses were reported to be at increased risk of preterm delivery, preeclampsia, fetal distress,  
70 labor dystocia, operative delivery, and perinatal mortality [16-21]. Hyperemesis gravidarum  
71 and hypertension-related growth retardation were significantly more common in pregnancies  
72 with female fetuses [22-25]. The influence of the combination of maternal age and fetal sex  
73 on pregnancy outcomes in term and post-term singleton pregnancies were also studied by  
74 Weissmann-Brenner et al. [26].

75 As far as we know, the combined impact of maternal age, parity and fetal sex on the  
76 outcomes of pregnancy has not been evaluated yet. Therefore, the aim of our study was to  
77 analyze the influence of maternal age (six age categories) on perinatal outcomes in both  
78 primiparous and multiparous women with different fetal sex. Based on the combination of  
79 maternal age, parity and fetal sex we would like to find the risk groups of mothers for adverse  
80 fetal outcomes.

81

## 82 **Material and Methods**

### 83 **Patients**

84 The study was designed as a cross-sectional study. The main data set covered women, who have  
85 given birth in the General University Hospital in Prague, Czech Republic between 2008-2012.  
86 Clinical records comprised maternal age, maternal body weight before pregnancy, number of  
87 previous deliveries, maternal weight before conception, pregnancy weight gain, duration of  
88 pregnancy, mode of delivery, birth weight, birth length and sex of the newborn. We studied the  
89 associations of these independent variables with following adverse binary outcomes: preterm  
90 delivery (delivery before 37 weeks of gestation; yes/no), low birth weight (birth weight < 2500g;  
91 yes/no), macrosomia (birth weight > 4500g; yes/no), and caesarean delivery (yes/no). The  
92 women those giving birth to twins were excluded from the analyses. During the whole study, we  
93 worked with an anonymized data set. The project was approved by IRB Faculty of Science,  
94 Charles University (No. 2017/26) (Etická komise pro práci s lidmi a lidským materiálem  
95 Přírodovědecké fakulty Univerzity Karlovy).

96

### 97 **Statistics**

98 The statistical program Statistica 10.0 was used for all statistical testing. Participants, both  
99 primiparous and multiparous women, were divided into six age categories  $\leq 19$  years, 20–24

100 years, 25–29 years, 30–34 years 35-39 years and  $\geq 40$  years by maternal age at conception.  
101 The influence of maternal age on pregnancy weight gain, duration of pregnancy, birth weight  
102 and birth length was analyzed using ANCOVA, General Linear Model (GLM). Because of  
103 non-monotone effects of age on the output variables, the variable age was analyzed as a  
104 categorical predictor variable. The variables maternal weight before conception, pregnancy  
105 weight gain and duration of pregnancy were successively added to the statistical model as  
106 continuous predictor variables. Association between age and output binary variables preterm  
107 delivery, low birth weight, macrosomia, and caesarean section was analyzed with the logistic  
108 regression, separately for four groups of women – primiparous/multiparous women with  
109 male/female newborns. For some women, certain data were not available and therefore  
110 numbers of women varied between analyses.

111

## 112 **Results**

113 The total data set contained records of 11,780 women. Table 1 shows age group-, sex of  
114 newborn- and parity- stratification of the data set. The influence of maternal age (six  
115 categories  $\leq 19$  years, 20–24 years, 25–29 years, 30–34 years 35-39 years and  $\geq 40$  years) and  
116 weight before conception, pregnancy weight gain, duration of pregnancy on pregnancy weight  
117 gain, duration of pregnancy, birth weight and birth length was evaluated using GLM, see Fig.  
118 1. Table 2 shows results of the statistical analyses (*P*-values and effect sizes for analyzing  
119 variables) for all models.

120

121 **Table 1: Composition of the data set**

| Age groups<br>years | Primiparous women |        | Multiparous women |        |
|---------------------|-------------------|--------|-------------------|--------|
|                     | male              | female | male              | female |
| Total               | 3,660             | 3,457  | 2,368             | 2,295  |

|       |      |      |      |      |
|-------|------|------|------|------|
| ≤19   | 22   | 22   | 16   | 17   |
| 20-24 | 196  | 163  | 133  | 108  |
| 25-29 | 811  | 781  | 465  | 472  |
| 30-34 | 1721 | 1632 | 1105 | 1054 |
| 35-39 | 784  | 740  | 569  | 553  |
| ≥40   | 126  | 119  | 80   | 91   |

122 Maternal age, parity, fetal sex and adverse fetal outcomes

123 age group-, sex of newborn- and parity- stratification

124

125 **Table 2. The influence of maternal age (six age categories: ≤ 19 years, 20–24 years, 25–29**  
 126 **years, 30–34 years 35-39 years and ≥ 40 years) on birth weight, pregnancy length,**  
 127 **pregnancy weight gain and birth length in three models (GLM).**

|                         | <i>Eta</i> <sup>2</sup> | <i>Maternal age</i> | <i>Maternal weight</i> | <i>Pregnancy length</i> | <i>Pregnancy weight gain</i> |
|-------------------------|-------------------------|---------------------|------------------------|-------------------------|------------------------------|
| <b>Birth</b>            | Model I                 | 0.004**             | 0.026**                | -                       | -                            |
| <b>Weight</b>           | Model II                | 0.008**             | 0.041**                | 0.488**                 | -                            |
| <b>(g)</b>              | Model III               | 0.011**             | 0.051**                | 0.462**                 | 0.047**                      |
| <b>Birth</b>            | Model I                 | 0.004**             | 0.014**                | -                       | -                            |
| <b>length</b>           | Model II                | 0.007**             | 0.023**                | 0.556**                 | -                            |
| <b>(cm)</b>             | Model III               | 0.010**             | 0.029**                | 0.535**                 | 0.026**                      |
| <b>Pregnancy</b>        | Model I                 | 0.007**             | 0.008**                | -                       | -                            |
| <b>weight gain (kg)</b> | Model II                | 0.008**             | 0.009**                | 0.044**                 | -                            |
| <b>Pregnancy</b>        | Model I                 | 0.002**             | 0.001*                 | -                       | -                            |
| <b>length (days)</b>    |                         |                     |                        |                         |                              |

128

129 Maternal age, parity, fetal sex and adverse fetal outcomes  
130 Variable maternal age was categorial independent variable, variables weight before  
131 conception, pregnancy length and pregnancy weight gain were gradually added as continuous  
132 independent variables in models I-III. The values in the table show effect size -  $\eta^2$ , \*\*  $P$ -  
133 values  $< 0.001$ , \*  $P$ -values  $< 0.05$  (GLM).

134

135

136 **Fig 1. Comparison of the birth weight (A), birth length (B), pregnancy weight gain (C)**  
137 **and duration of pregnancy (D) in women with six age groups.**

138 The x-axis shows the age groups by maternal age at conception: 1:  $\leq 19$  years, 2: 20–24 years,  
139 3: 25–29 years, 4: 30–34 years, 5: 35–39 years and 6:  $\geq 40$  years. Vertical bars denote +/-  
140 standard errors. The numbers above the boxes show the number of women in a particular  
141 category.

142

143 The interaction of three variables, maternal age groups, sex of newborn and parity was  
144 analyzed in another statistical model. Patients were divided into three age categories  $\leq 19$   
145 years (teens age), 20–39 years and  $\geq 40$  years (advanced maternal age) by maternal age at  
146 conception in this analysis. These age categories were also used in similar studies focused on  
147 the teenaged women [3, 11] and on the advanced maternal age [10, 26]. No covariates were  
148 included in this basic model. Table 3 shows results ( $P$ -values) of statistical analyses (GLM)  
149 and Fig. 2 shows direction and size of the effects.

150

151

152 **Table 3. Effects of age, parity, sex, and their interaction on pregnancy output variables**

|  | <i>birth weight</i> | <i>birth length</i> | <i>weight gain</i> | <i>pregnancy length</i> |
|--|---------------------|---------------------|--------------------|-------------------------|
|--|---------------------|---------------------|--------------------|-------------------------|

|                |         |         |         |         |
|----------------|---------|---------|---------|---------|
| age            | < 0.001 | < 0.001 | < 0.001 | < 0.001 |
| parity         | 0.428   | 0.323   | 0.251   | 0.142   |
| sex            | 0.037   | 0.047   | 0.360   | 0.435   |
| age*parity     | 0.894   | 0.838   | 0.153   | 0.512   |
| age*sex        | 0.195   | 0.056   | 0.904   | 0.101   |
| parity*sex     | 0.289   | 0.061   | 0.271   | 0.006   |
| age*parity*sex | 0.171   | 0.068   | 0.221   | 0.019   |

153 Maternal age, parity, fetal sex and adverse fetal outcomes

154 Because of non-monotonic effect of maternal age, this variable was entered into the model as  
155 the categorical variable (three age categories  $\leq 19$  years, 20-39 years and  $\geq 40$  years), sex (sex  
156 of newborn) and parity (primiparous /multiparous women), the values in the table show *P*-  
157 values of statistical analyses (GLM).

158

159

160 **Fig 2. Comparison of the birth weight (A), birth length (B), pregnancy weight gain (C)**  
161 **and duration of pregnancy (D) in interaction women with three different age groups,**  
162 **fetal sex and parity.**

163 Left graphs show primiparous and right graphs multiparous women. Full squares show  
164 women with female newborn and unfilled circles show women with male newborn. The x-  
165 axis shows the age groups by maternal age at conception: 1:  $\leq 19$  years, 2: 20-39 years and 3:  
166  $\geq 40$  years. Vertical bars denote +/- standard errors. The numbers above the lines between the  
167 bars show *P*-value of statistical analyses (t-test).

168

169



170 In our data, we observed 7.9 % of preterm deliveries (before 37 weeks), 6.2 % low  
171 birth weight rate (< 2500g), 1 % macrosomia > 4,500g and 32.7 % caesarean deliveries in our  
172 data set. Table 4 shows the influence of the maternal age on the binary variables (0/1):  
173 preterm delivery, low birth weight, macrosomia > 4,500g and caesarean delivery, separately  
174 for primiparous resp. multiparous women and women with male resp. female newborns. The  
175 age limits for the comparison of risks of adverse delivery outcomes were determined based on  
176 the results of previous studies focused on the study of similar variables [7, 11, 27, 28]. The  
177 odds of preterm delivery, low birth weight, macrosomia > 4,500g and caesarean delivery were  
178 statistically compared in selected age groups for primiparous resp. multiparous women and  
179 women with male resp. female sex of newborns (Table 5). Women  $\leq 19$  years had  
180 significantly higher rates of preterm delivery than women 20-39 years ( $P = 0.012$ , OR = 3.62,  
181  $CI_{95} = 1.32-9.90$ ) in primiparous with female newborns. Women older than 40 years had  
182 significantly higher rates of preterm delivery than women 20-39 years old ( $P = 0.003$ , OR =  
183 1.86,  $CI_{95} = 1.23-2.82$ ) in women with male newborns. To assess the influence of maternal  
184 age on the low birth weight, the women were subdivided into two age groups: maternal age  $\leq$   
185 24 years and maternal age > 24 years. The younger women expressed higher rates of low birth  
186 weight ( $P < 0.001$ , OR = 1.87,  $CI_{95} = 1.44-2.42$ ). This effect of age was significant for both  
187 the primiparous and the multiparous women, regardless to the sex of newborns. Similarly, the  
188 interaction of parity and sex of the newborn was significant in all models. The older (age  $\geq 35$   
189 years) primiparous women with male newborns expressed higher incidence of macrosomia ( $P$   
190 = 0.021, OR = 2.04,  $CI_{95} = 1.12-3.71$ ) compared to other groups of women. The probability of  
191 caesarean delivery increased with the age in the 6 age categories ( $P < 0.001$ , OR = 1.99,  $CI_{95}$   
192 = 1.61-2.46) for primiparous and multiparous women, for male and female newborns and in  
193 all models. The probability was also significantly affected by the parity-sex of newborn  
194 interaction (Table 5).

195 **Table 4. Delivery outcomes in both primiparous/multiparous women and women with male/female sex of the newborn across different**  
 196 **age category**

|                        |            | ≤ 19          | 20-24          | 25-29             | 30-34              | 35-39             | ≥ 40            |
|------------------------|------------|---------------|----------------|-------------------|--------------------|-------------------|-----------------|
| Preterm<br>delivery    | primiparae | 44; 8(18.2)   | 360; 34 (9.4)  | 1,595; 140 (8.8)  | 3,352; 258 (7.7)   | 1,524; 112 (7.4)  | 245; 31 (12.7)  |
|                        | multiparae | 33; 3 (9.1)   | 241; 23 (9.5)  | 937; 58 (6.2)     | 2,159; 151 (7.0)   | 1122; 97 (8.6)    | 171; 13 (7.6)   |
|                        | male       | 38; 4 (10.5)  | 329; 32 (9.7)  | 1,276; 104 (8.2)  | 2,824; 207 (7.3)   | 1,352; 107 (7.9)  | 206; 28 (13.6)  |
|                        | female     | 39; 7 (17.9)  | 271; 25 (9.2)  | 1,253; 91 (7.3)   | 2,685; 200 (7.4)   | 1,293; 102 (7.9)  | 210; 16 (7.6)   |
| Low birth<br>weight    | primiparae | 44; 6 (13.6)  | 359; 39 (10.9) | 1,593; 114 (7.2)  | 3,352; 209 (6.2)   | 1524; 93 (6.1)    | 245; 21 (8.6)   |
|                        | multiparae | 33; 3 (9.1)   | 241; 23 (9.5)  | 937; 47 (5.0)     | 2,159; 101 (4.7)   | 1122; 60 (5.3)    | 171; 11 (6.4)   |
|                        | male       | 38; 3 (7.9)   | 329; 33 (10.0) | 1,276; 77 (6.0)   | 2,826; 142 (5.0)   | 1353; 59 (4.4)    | 206; 18 (8.7)   |
|                        | female     | 39; 6 (15.4)  | 271; 29 (10.7) | 1,253; 83 (6.6)   | 2,685; 168 (6.3)   | 1,293; 94 (7.3)   | 210; 14 (6.7)   |
| Macrosomia<br>> 4,500g | primiparae | 44; 0 (0)     | 359; 0 (0)     | 1,593; 12 (0.75)  | 3,352; 28 (0.84)   | 1524; 20 (1.3)    | 245; 1 (0.41)   |
|                        | multiparae | 33; 0 (0)     | 241; 5 (2.1)   | 937; 11 (1.2)     | 2,159; 17 (0.79)   | 1122; 17 (1.5)    | 171; 5 (2.9)    |
|                        | male       | 38; 0 (0)     | 329; 4 (1.2)   | 1,279; 14 (1.1)   | 2,826; 30 (1.1)    | 1,353; 27 (2.0)   | 206; 4 (1.9)    |
|                        | female     | 39; 0 (0)     | 271; 1 (0.4)   | 1,253; 9 (0.7)    | 2,685; 15 (0.6)    | 1,293; 10 (0.8)   | 210; 2 (1.0)    |
| Caesarean              | primiparae | 43; 13 (30.2) | 347; 96 (27.7) | 1,554; 499 (32.1) | 3,244; 1143 (35.2) | 1,478; 560 (37.9) | 238; 115 (48.3) |

|            |                                                                                                                                                                                                                                                                                                                                                                                                                                                                                                                                                                                    |                |                   |                   |                   |                   |                   |                |      |               |                |                   |                   |                   |                |        |              |                |                   |                   |                   |                |
|------------|------------------------------------------------------------------------------------------------------------------------------------------------------------------------------------------------------------------------------------------------------------------------------------------------------------------------------------------------------------------------------------------------------------------------------------------------------------------------------------------------------------------------------------------------------------------------------------|----------------|-------------------|-------------------|-------------------|-------------------|-------------------|----------------|------|---------------|----------------|-------------------|-------------------|-------------------|----------------|--------|--------------|----------------|-------------------|-------------------|-------------------|----------------|
| delivery   | <table border="1"> <tr> <td>multiparae</td> <td>33; 7 (21.2)</td> <td>233; 56 (24.0)</td> <td>913, 234 (25.6)</td> <td>2,103; 628 (29.9)</td> <td>1,094; 330 (30.2)</td> <td>167; 56 (33.5)</td> </tr> <tr> <td>male</td> <td>37; 11 (29.7)</td> <td>317; 91 (28.7)</td> <td>1,240; 381 (30.7)</td> <td>2,728; 928 (34.0)</td> <td>1,301; 464 (35.7)</td> <td>202; 88 (43.6)</td> </tr> <tr> <td>female</td> <td>39; 9 (23.1)</td> <td>262; 61 (23.3)</td> <td>1,225; 352 (28.7)</td> <td>2,618, 843 (32.2)</td> <td>1,270; 426 (33.5)</td> <td>203, 83 (40.9)</td> </tr> </table> | multiparae     | 33; 7 (21.2)      | 233; 56 (24.0)    | 913, 234 (25.6)   | 2,103; 628 (29.9) | 1,094; 330 (30.2) | 167; 56 (33.5) | male | 37; 11 (29.7) | 317; 91 (28.7) | 1,240; 381 (30.7) | 2,728; 928 (34.0) | 1,301; 464 (35.7) | 202; 88 (43.6) | female | 39; 9 (23.1) | 262; 61 (23.3) | 1,225; 352 (28.7) | 2,618, 843 (32.2) | 1,270; 426 (33.5) | 203, 83 (40.9) |
| multiparae | 33; 7 (21.2)                                                                                                                                                                                                                                                                                                                                                                                                                                                                                                                                                                       | 233; 56 (24.0) | 913, 234 (25.6)   | 2,103; 628 (29.9) | 1,094; 330 (30.2) | 167; 56 (33.5)    |                   |                |      |               |                |                   |                   |                   |                |        |              |                |                   |                   |                   |                |
| male       | 37; 11 (29.7)                                                                                                                                                                                                                                                                                                                                                                                                                                                                                                                                                                      | 317; 91 (28.7) | 1,240; 381 (30.7) | 2,728; 928 (34.0) | 1,301; 464 (35.7) | 202; 88 (43.6)    |                   |                |      |               |                |                   |                   |                   |                |        |              |                |                   |                   |                   |                |
| female     | 39; 9 (23.1)                                                                                                                                                                                                                                                                                                                                                                                                                                                                                                                                                                       | 262; 61 (23.3) | 1,225; 352 (28.7) | 2,618, 843 (32.2) | 1,270; 426 (33.5) | 203, 83 (40.9)    |                   |                |      |               |                |                   |                   |                   |                |        |              |                |                   |                   |                   |                |

197 Maternal age, parity, fetal sex and adverse fetal outcomes

198 Total n; number of affected (% of affected)

199

200 **Table 5**

201 Delivery outcomes in primiparous/multiparous women (Ppara/Mpara), in women with male/female sex of newborn (M/F) and in their

202 interactions, comparisons for different maternal age category, logistic regression (*P*-values), Odds ratio (OR), 95% confidence interval (CI<sub>95</sub>)

|              | Preterm delivery      |          |                       |          | Low birth weight      |          | Macrosomia            |          | Caesarean delivery          |          |
|--------------|-----------------------|----------|-----------------------|----------|-----------------------|----------|-----------------------|----------|-----------------------------|----------|
|              | Age ≤ 19 vs. 20-39    |          | Age ≥ 40 vs. 20-39    |          | Age ≤ 24 vs. > 24     |          | Age ≥ 35 vs. < 35     |          | Comparison 6 age categories |          |
|              | OR(CI <sub>95</sub> ) | <i>P</i> | OR(CI <sub>95</sub> ) | <i>P</i> | OR(CI <sub>95</sub> ) | <i>P</i> | OR(CI <sub>95</sub> ) | <i>P</i> | OR(CI <sub>95</sub> )       | <i>P</i> |
| <b>All</b>   | 1.99(1.06-3.73)       | 0.032    | 1.41(1.00-1.99)       | 0.049    | 1.87(1.44-2.42)       | <0.001   | 1.69(1.15-2.47)       | 0.007    | 1.99(1.61-2.46)             | <0.001   |
| <b>Ppara</b> | 2.57(1.18-5.59)       | 0.017    | 1.67(1.13-2.48)       | 0.010    | 1.81(1.30-2.50)       | 0.004    | 1.59(0.94-2.72)       | 0.086    | 2.23(1.70-2.95)             | < 0.001  |
| <b>Mpara</b> | 1.26(0.37-4.25)       | 0.715    | 0.97(0.26-3.65)       | 0.961    | 2.00(1.30-3.06)       | 0.002    | 1.75(1.02-3.01)       | 0.043    | 1.76(1.24-2.50)             | 0.002    |
| <b>Male</b>  | 1.39(0.33-5.94)       | 0.654    | 1.86(1.23-2.82)       | 0.003    | 1.97(1.37-2.84)       | < 0.001  | 1.87(1.19-2.95)       | 0.007    | 1.88(1.40-2.53)             | < 0.001  |

|                |                 |       |                 |       |                 |       |                 |       |                 |         |
|----------------|-----------------|-------|-----------------|-------|-----------------|-------|-----------------|-------|-----------------|---------|
| <b>Female</b>  | 2.66(1.16-6.13) | 0.021 | 1.00(0.92-1.09) | 0.942 | 1.80(1.24-2.61) | 0.002 | 1.36(0.68-2.73) | 0.387 | 2.12(1.55-2.90) | < 0.001 |
| <b>Ppara-M</b> | 1.75(0.51-6.04) | 0.374 | 1.73(1.02-2.94) | 0.042 | 2.03(1.30-3.17) | 0.002 | 2.04(1.12-3.71) | 0.021 | 1.99(1.36-2.92) | < 0.001 |
| <b>Ppara-F</b> | 3.62(1.32-9.90) | 0.012 | 1.64(0.93-2.89) | 0.085 | 1.63(1.02-2.62) | 0.042 | 0.70(0.20-2.46) | 0.575 | 2.52(1.70-3.75) | < 0.001 |
| <b>Mpara-M</b> | 0.88(0.17-4.57) | 0.879 | 2.10(1.09-4.06) | 0.026 | 1.90(1.01-3.54) | 0.044 | 1.65(0.82-3.52) | 0.158 | 1.76(1.09-2.85) | 0.020   |
| <b>Mpara-F</b> | 1.59(0.36-6.97) | 0.537 | 0.27(0.07-1.10) | 0.068 | 2.14(1.19-3.84) | 0.011 | 1.94(0.81-4.61) | 0.136 | 1.80(1.08-3.01) | 0.025   |

203

204 Maternal age, parity, fetal sex and adverse fetal outcomes

205

206

207

208

209

210

211

212

## Discussion

The results of our study have confirmed that maternal age at conception significantly affects the perinatal outcomes. The observed functions of age were always non-linear. With increasing age, the birth weight and birth length of the newborn increased up to maternal age of 35-39 years, and after this age these rates decreased again. We saw a similar trend for the variable duration of pregnancy, however, duration of pregnancy increased up to maternal age of 25-34 and after this age these rates decreased again. The maternal weight gain during pregnancy decreased from the maternal age of 20-24 years. This non-linear age effect on the variables is in agreement with already published data. Women who are too young [5, 11-14] or older women [4, 6, 10] are a high risk group of women with more frequent perinatal complications. It is known that weight gain during pregnancy and duration of pregnancy are affected by the maternal weight before pregnancy [29, 30] and also by interaction of the maternal Rh-factor and latent infection with protozoan *Toxoplasma gondii* [31]. In our study, the effect of maternal age on weight gain during pregnancy and on the duration of pregnancy was relatively small, however, it was comparable with the effect of maternal weight before pregnancy on these variables.

The birth outcomes were affected by the parity and sex of the newborns in all age groups. Mothers aged 20-39 gave birth to significantly heavier and longer boys than girls and parity resulted in no effect on sex of the newborns. These results are in accordance with previous studies, which found that boys weighed at birth more than girls [17, 18]. In the age group of 20-39 years, the primiparous women also gained more than the multiparous women, with no difference in the sex of the offspring (near the formal border of significance). In addition, mothers with male fetuses gained more weight than mothers with female fetuses, both in primiparous (near the formal border of significance) and multiparous, which is in accordance with the higher birth rates in boys in this age group. In the age categories of

younger ( $\leq 19$ ) and older ( $\geq 40$ ) mothers, these effects were not likely to be observed for reasons of low N and greater variance of data in these age categories. However, visual inspection of data (Fig. 2) suggests that maternal age alone has a strong influence on birth weight, while the sex of newborns doesn't play a role in these age groups. It must be emphasized that the previous studies showing higher birth rates in boys were performed in mothers without taking into account their age.

In mothers aged 40 and more, we found higher birth weight and length in newborns of multiparous than in primiparous women, both for girls (birth length was near the formal border of significance) and for boys (significant). This may be related to the fact that the incidence of macrosomia was observed more frequently in male newborns in the older multiparous mothers ( $\geq 35$ ) in our data set. Higher delivery rates for girls could then be due to a longer pregnancy, as the length of pregnancy was also affected by the parity and sex of the newborns in mothers aged 40 years and more. The multiparous who gave birth to a girl had the longer pregnancy in comparison to primiparous who gave birth to a girl. Longer pregnancies were also recorded in multiparous mothers with girls than in multiparous mothers who gave birth to a boy.

Significantly more preterm births were observed in very young women and among women of advanced maternal age. The preterm birth was recorded twice as often in young mothers ( $\leq 19$ ) than in mothers aged 20-39. In addition, 2.5 times more often in the group of primiparous and up to 3.5 times more often in the group of primiparous who gave birth to a girl. Several other studies have reported more premature newborns among parents of early age [11, 28, 32]. The incidence of preterm delivery can be affected by social factors such as the low socio-economic status of the family, the low level of medical care during pregnancy, maternal stress, and the hostile environment at the place of residence [33-35]. These women tend to be in poor health, and according to the T-W Hypothesis [36], they could be more

likely to give birth to girls than boys. This could explain our observation of the effect of maternal age on the preterm birth in young primiparous mothers of girls.

The preterm birth was also recorded 1.5 times more frequently in the older primiparous ( $\geq 40$ ) than in primiparous in the 20-39 aged mothers and almost twice as often in older mothers ( $\geq 40$ ) with a boy than in mothers aged 20-39 with a boy. The preterm delivery was 2 times more common in multiparous women who gave birth to a boy and the likelihood of preterm birth decreased in multiparous women who gave birth to a girl in comparison to the control group (age 20-39). These findings are largely consistent with those of other relevant studies showing that women of advanced maternal age are at greater risk for having preterm birth [10, 27]. A higher incidence of preterm birth has been observed among mothers of male newborns compared with mothers of females [17], however, no work has documented the combination of dependence between sex, parity, and age.

Maternal age at delivery was significantly higher for macrosomic neonates [7], maternal age ranging between 30 and 39 years, multiparity and gestational age  $\geq 40$  years were significantly associated with fetal macrosomia [4]. In our data set we have confirmed a more frequent occurrence of macrosomic neonates in multiparous in older age ( $\geq 35$ ). An increased risk for macrosomic neonates was also observed in older mothers ( $\geq 35$ ) who gave birth to a boy, and this effect was strongest in primiparous (OR = 2). Also, previous studies demonstrated that women carrying male fetuses are at increased risk of macrosomia [7, 37, 38]. Although macrosomia is associated with a higher gestational age, it has been shown in our data set that older mothers ( $\geq 40$ ) carrying male fetuses have a higher risk of preterm birth, which is inconsistent with current studies [4]. Based on our analysis, primiparous women aged  $\geq 35$  carrying the male fetus are the riskiest group of mothers associated with fetal macrosomia.

In our study, the low birth weight of the newborns was observed almost twice as often in all young women ( $24 \leq$ ) than in women over the age of 24, regardless of the parity and sex of the newborns. Our results are in accordance with studies that have shown that teenage groups ( $<25$ ) were associated with increased risks for low birth weight [11]. Also, pregnant women aged  $<27$  years or  $>32$  years carried a greater risk for having a low birth weight infant compared to those aged 27 years [5]. Our data also showed that the low birth weight was not affected by the sex of the newborns or by the maternal parity as opposed to other adverse birth outcomes.

The risk of delivery by caesarean section significantly increased with the maternal age, regardless of the parity and sex of the newborns. Almost 50 % of primiparous mothers older than 40 had caesarean delivery. Based on Table 4, the risk of caesarean delivery was higher in primiparous than multiparous, and also in mothers carrying male fetuses than in mothers carrying female fetuses in all age groups. Our results correspond with previous studies that show an increased risk of caesarean section in women  $\geq 40$  [8, 9] and in women carrying male fetuses [18]. Also, the risk of operative deliveries increased with maternal age  $\geq 40$  and in pregnancies with male fetuses [26]. A portion of the results could be explained by a more frequent occurrence of neonatal macrosome in mothers aged  $\geq 35$ , as macrosomia is associated with more frequent births by caesarean section [39, 40].

An important limitation of the study was a relatively smaller sample size in sub-analyses evaluated across the different age categories for sex of newborns and both primiparous and multiparous women. The second limitation of the study was the absence of information about maternal socio-economic status (such as prenatal care, marital status, residence, educational level, tobacco and alcohol consumption). The great benefit of this study is that it has been done across all age categories and was not limited to the selected age



group of women as in most studies, and different risk age limits could be set based on observed values.

## **Conclusions**

The results of our study could facilitate risk assessment and consequent optimal health care for pregnant mothers in high risk age categories with respect to parity and possible knowledge of the sex of the child during pregnancy. All results of our research together indicate that “optimal” maternal age without perinatal complications is 25-34 years. The older age is associated with increased risk of complications especially in primiparous women bearing a male fetus. Whereas the pregnancies of younger women bearing a female fetus are at higher risk, too. Our results open further possibilities for research that should analyze the wider spectrum of possible causes of adverse fetal outcomes in more detail.

## **Acknowledgments**

The study was supported by Charles University Research Centre program No. 204056 and RVO-VFN64165 from the Ministry of Health of the Czech Republic.

## **References**

1. Berthoud R, Robson K. The outcomes of teenage motherhood in Europe: Citeseer; 2001.
2. Dye JL. Fertility of American women: 2008. CPR. 2010;(P20-563).
3. Wingo PA, Smith RA, Tevendale HD, Ferré C. Recent changes in the trends of teen birth rates, 1981–2006. *J Adolesc Health*. 2011;48(3):281-8.
4. Said AS, Manji KP. Risk factors and outcomes of fetal macrosomia in a tertiary centre in Tanzania: a case-control study. *BMC pregnancy and childbirth*. 2016;16(1):243.
5. Weng Y-H, Yang C-Y, Chiu Y-W. Risk assessment of adverse birth outcomes in relation to maternal age. *PLoS One*. 2014;9(12):e114843.

6. Laopaiboon M, Lumbiganon P, Intarut N, Mori R, Ganchimeg T, Vogel J, et al. Advanced maternal age and pregnancy outcomes: a multicountry assessment. *BJOG*. 2014;121(s1):49-56.
7. Weissmann-Brenner A, Simchen MJ, Zilberberg E, Kalter A, Weisz B, Achiron R, et al. Maternal and neonatal outcomes of macrosomic pregnancies. *Med Sci Monit*. 2012;18(9):PH77.
8. Vincent-Rohfritsch A, Le CR, Anselem O, Cabrol D, Goffinet F. Pregnancy in women aged 43 years or older: maternal and perinatal risks. *Journal de gynecologie, obstetrique et biologie de la reproduction*. 2012;41(5):468-75.
9. Favilli A, Pericoli S, Acanfora MM, Bini V, Di Renzo GC, Gerli S. Pregnancy outcome in women aged 40 years or more. *J Matern Fetal Neonatal Med*. 2012;25(8):1260-3.
10. Jacobsson B, Ladfors L, Milsom I. Advanced maternal age and adverse perinatal outcome. *Obstet Gynecol*. 2004;104(4):727-33.
11. Chen X-K, Wen SW, Fleming N, Demissie K, Rhoads GG, Walker M. Teenage pregnancy and adverse birth outcomes: a large population based retrospective cohort study. *Int J Epidemiol*. 2007;36(2):368-73.
12. de Vienne CM, Creveuil C, Dreyfus M. Does young maternal age increase the risk of adverse obstetric, fetal and neonatal outcomes: a cohort study. *Eur J Obstet Gynecol Reprod Biol*. 2009;147(2):151-6.
13. Bateman BT, Simpson LL. Higher rate of stillbirth at the extremes of reproductive age: A large nationwide sample of deliveries in the United States. *Am J Obstet Gynecol*. 2006;194(3):840-5. doi: 10.1016/j.ajog.2005.08.038. PubMed PMID: WOS:000235985600039.
14. Gortzak-Uzan L, Hallak M, Press F, Katz M, Shoham-Vardi I. Teenage pregnancy: risk factors for adverse perinatal outcome. *J Matern Fetal Med*. 2001;10(6):393-7.
15. Hansen JP. Older maternal age and pregnancy outcome: a review of the literature. *Obstet Gynecol Surv*. 1986;41(11):726-42.
16. Melamed N, Yogev Y, Glezerman M. Fetal gender and pregnancy outcome. *J Matern Fetal Neonatal Med*. 2010;23(4):338-44.
17. Di Renzo GC, Rosati A, Sarti RD, Cruciani L, Cutuli AM. Does fetal sex affect pregnancy outcome? *Gend Med*. 2007;4(1):19-30.
18. Sheiner E, Levy A, Katz M, Hershkovitz R, Leron E, Mazor M. Gender does matter in perinatal medicine. *Fetal Diagn Ther*. 2004;19(4):366-9.
19. Ingemarsson I. Gender aspects of preterm birth. *BJOG*. 2003;110(s20):34-8.
20. Lieberman E, Lang JM, Cohen AP, Frigoletto FD, Acker D, Rao R. The association of fetal sex with the rate of cesarean section. *Am J Obstet Gynecol*. 1997;176(3):667-71.
21. Sheiner E. The relationship between fetal gender and pregnancy outcome. *Arch Gynecol Obstet*. 2007;275(5):317-9. doi: 10.1007/s00404-007-0341-5.
22. Hadar E, Melamed N, Sharon-Weiner M, Hazan S, Rabinerson D, Glezerman M, et al. The association between stillbirth and fetal gender. *J Matern Fetal Neonatal Med*. 2012;25(2):158-61.
23. Ghidini A, Salafia CM. Gender differences of placental dysfunction in severe prematurity. *BJOG*. 2005;112(2):140-4.

24. Demissie K, Breckenridge MB, Joseph L, Rhoads GG. Placenta previa: preponderance of male sex at birth. *Am J Epidemiol.* 1999;149(9):824-30.
25. James W. Sex ratios of offspring and the causes of placental pathology. *Hum Reprod.* 1995;10(6):1403-6.
26. Weissmann-Brenner A, Simchen MJ, Zilberberg E, Kalter A, Dulitzky M. Combined effect of fetal sex and advanced maternal age on pregnancy outcomes. *Med Sci Monit.* 2015;21:1124.
27. Mousiolis A, Baroutis G, Sindos M, Costalos C, Antsaklis A. Maternal age as a predictive factor of pre-term birth. An epidemiological study from 1999 to 2008 in Greece. *J Obstet Gynaecol.* 2013;33(1):28-31.
28. Woodward LJ, Friesen MD, Raudino A, Fergusson DM, Horwood LJ. Intergenerational changes in the context of early motherhood. *J Fam Stud.* 2013;19(3):306-14.
29. Alavi N, Haley S, Chow K, McDonald SD. Comparison of national gestational weight gain guidelines and energy intake recommendations. *Obes Rev.* 2013;14(1):68-85. doi: 10.1111/j.1467-789X.2012.01059.x. PubMed PMID: WOS:000312546900006.
30. Rasmussen K, Yaktine A. Weight gain during pregnancy: reexamining the guidelines. Food and Nutrition Board, Board on Children, Youth and Families, Institute of Medicine, National Research Council Committee to Reexamine IOM Pregnancy Weight Guidelines Washington, DC: National Academies Press. 2009.
31. Kaňková Š, Šulc J, Flegr J. Increased pregnancy weight gain in women with latent toxoplasmosis and RhD-positivity protection against this effect. *Parasitology.* 2010;137(12):1773-9.
32. Fraser AM, Brockert JE, Ward RH. Association of young maternal age with adverse reproductive outcomes. *N Engl J Med.* 1995;332(17):1113-8.
33. Berkowitz GS, Skovron ML, Lapinski RH, Berkowitz RL. Delayed childbearing and the outcome of pregnancy. *N Engl J Med.* 1990;322(10):659-64.
34. Wang Y, Tanbo T, Åbyholm T, Henriksen T. The impact of advanced maternal age and parity on obstetric and perinatal outcomes in singleton gestations. *Arch Gynecol Obstet.* 2011;284(1):31-7.
35. Holzman C, Eyster J, Kleyn M, Messer LC, Kaufman JS, Laraia BA, et al. Maternal weathering and risk of preterm delivery. *Am J Public Health.* 2009;99(10):1864-71.
36. Trivers RL, Willard DE. Natural selection of parental ability to vary the sex ratio of offspring. *Science.* 1973;179(4068):90-2.
37. Koyanagi A, Zhang J, Dagvadorj A, Hirayama F, Shibuya K, Souza JP, et al. Macrosomia in 23 developing countries: an analysis of a multicountry, facility-based, cross-sectional survey. *Lancet.* 2013;381(9865):476-83.
38. Ju H, Chadha Y, Donovan T, O'Rourke P. Fetal macrosomia and pregnancy outcomes. *Aust N Z J Obstet Gynaecol.* 2009;49(5):504-9.
39. Spellacy W, Miller S, Winegar A, Peterson P. Macrosomia - maternal characteristics and infant complications. *Obstet Gynecol.* 1985;66(2):158-61.
40. Modanlou HD, Dorchester WL, Thorosian A, Freeman RK. Macrosomia - maternal, fetal, and neonatal implications. *Obstet Gynecol.* 1980;55(4):420-4.

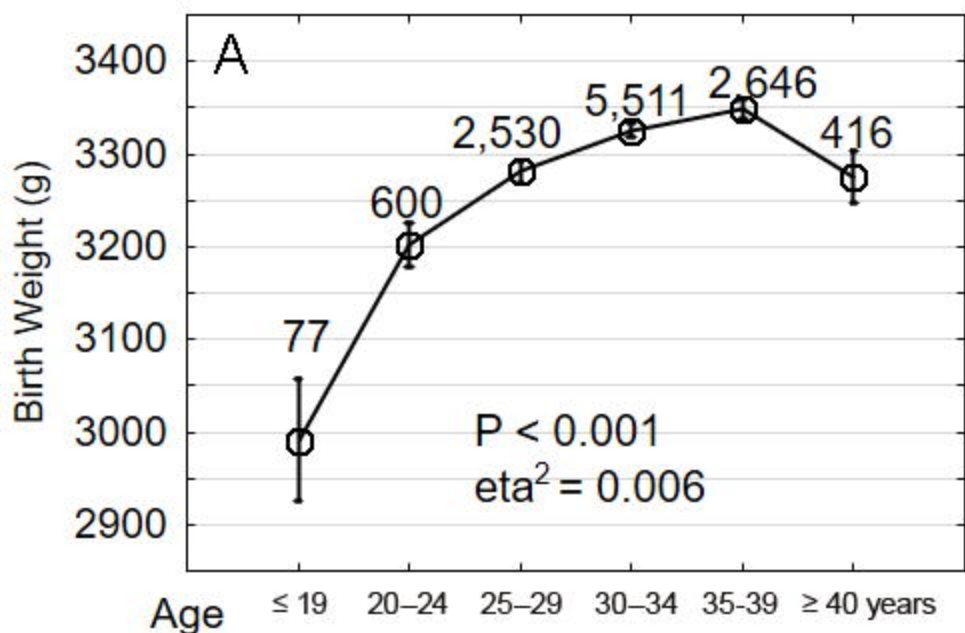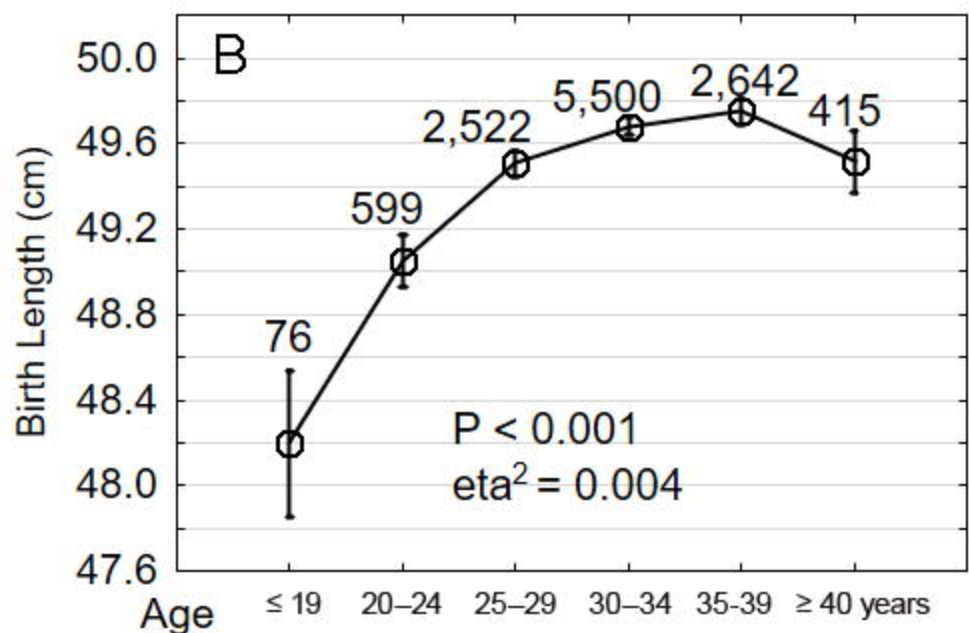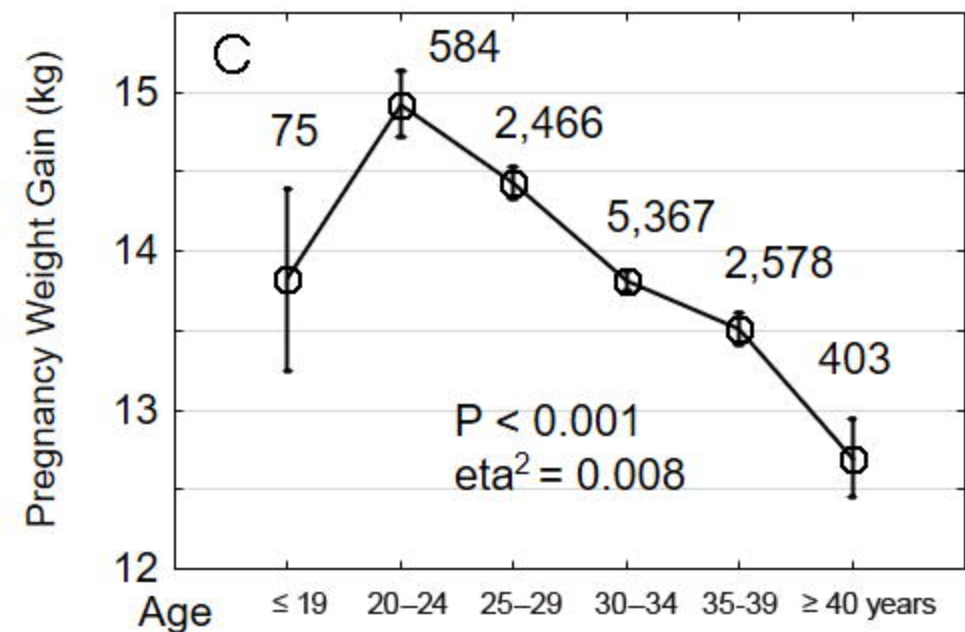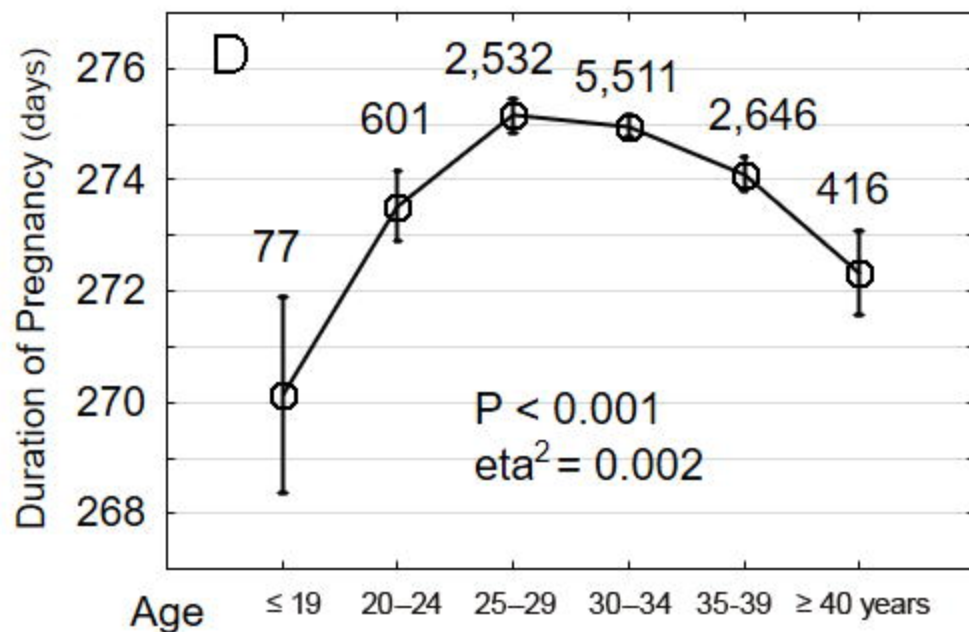

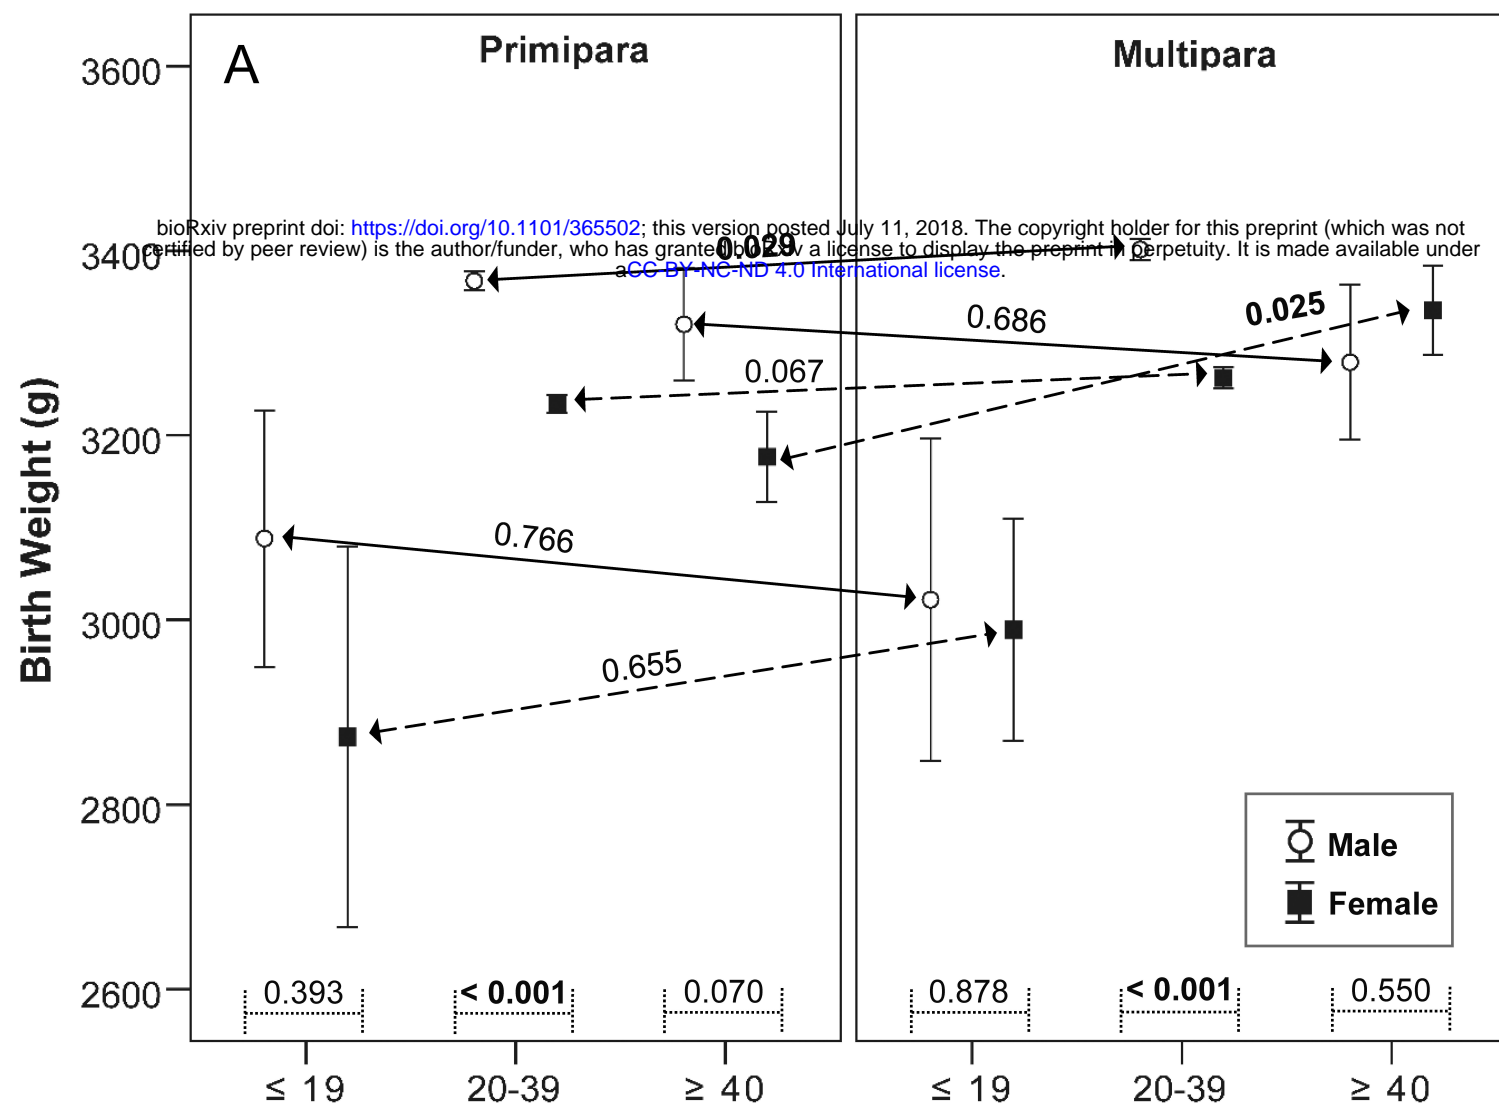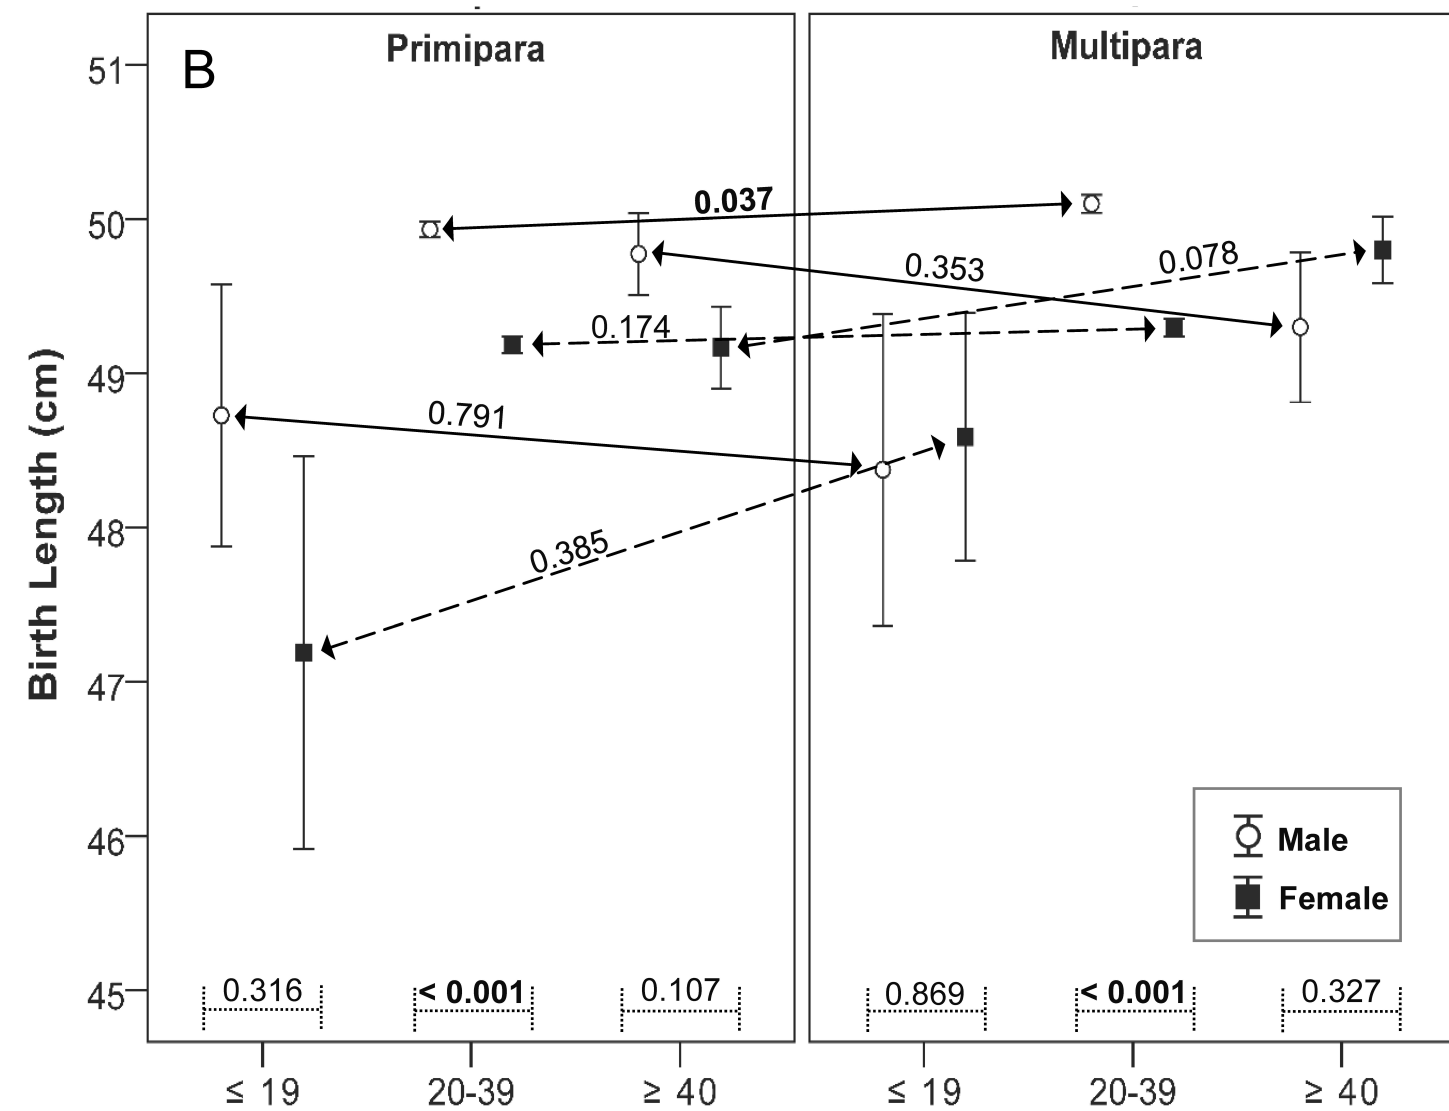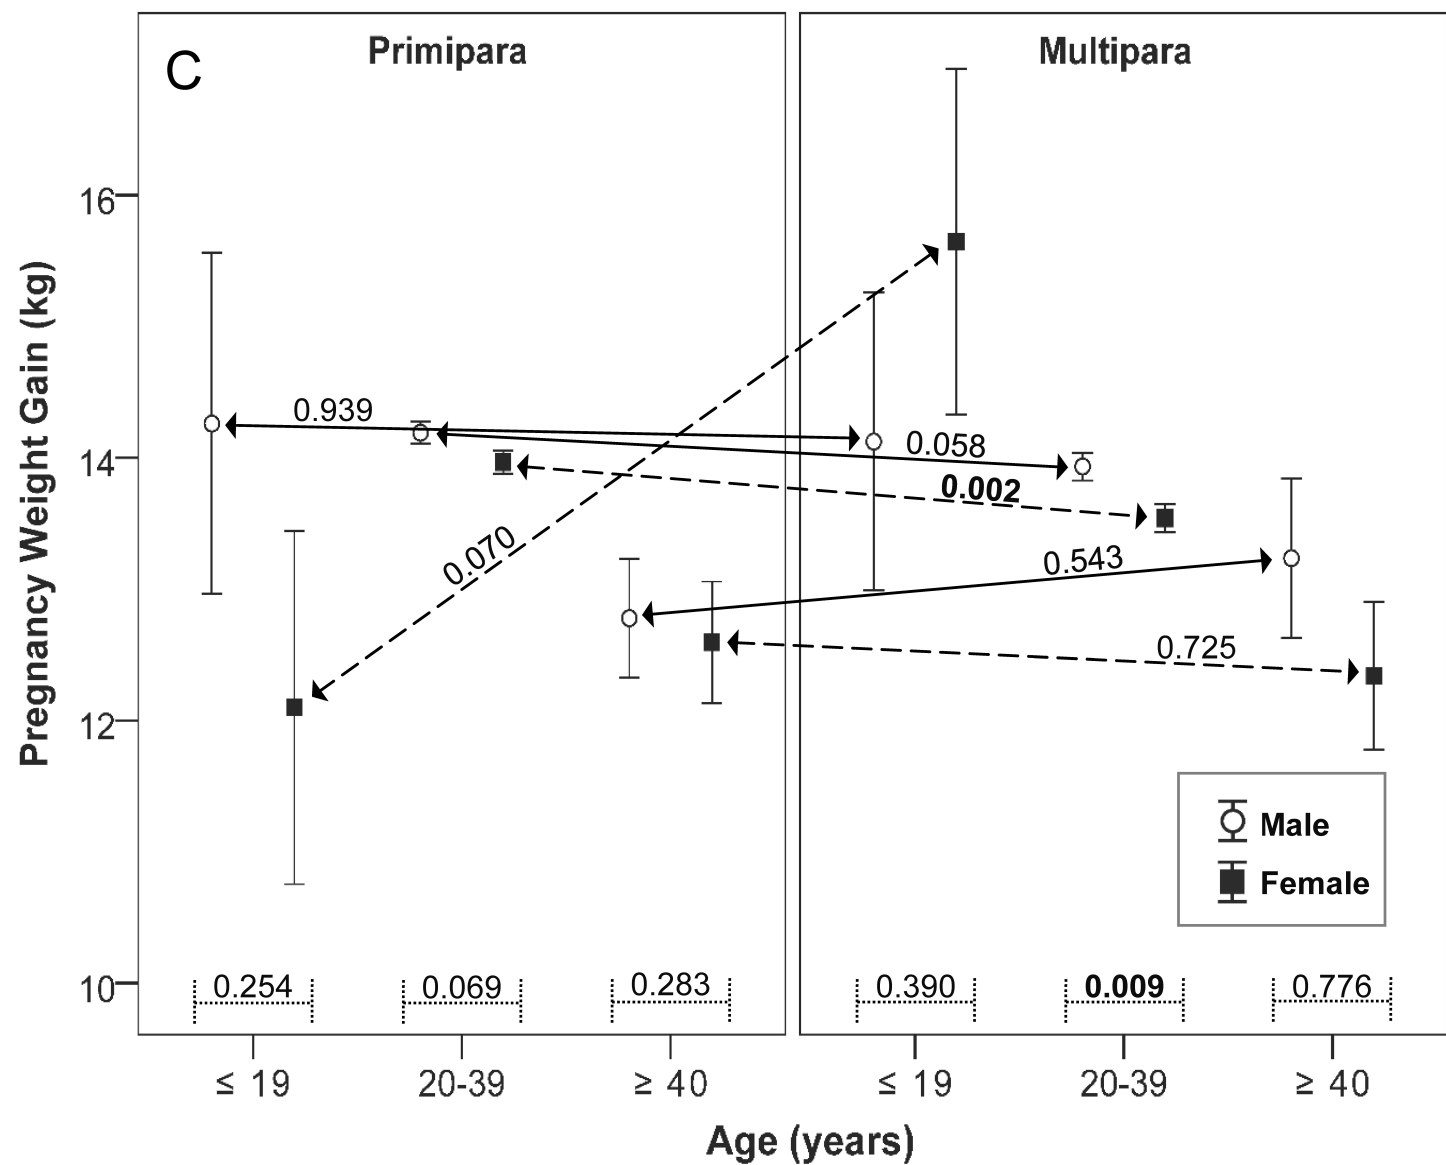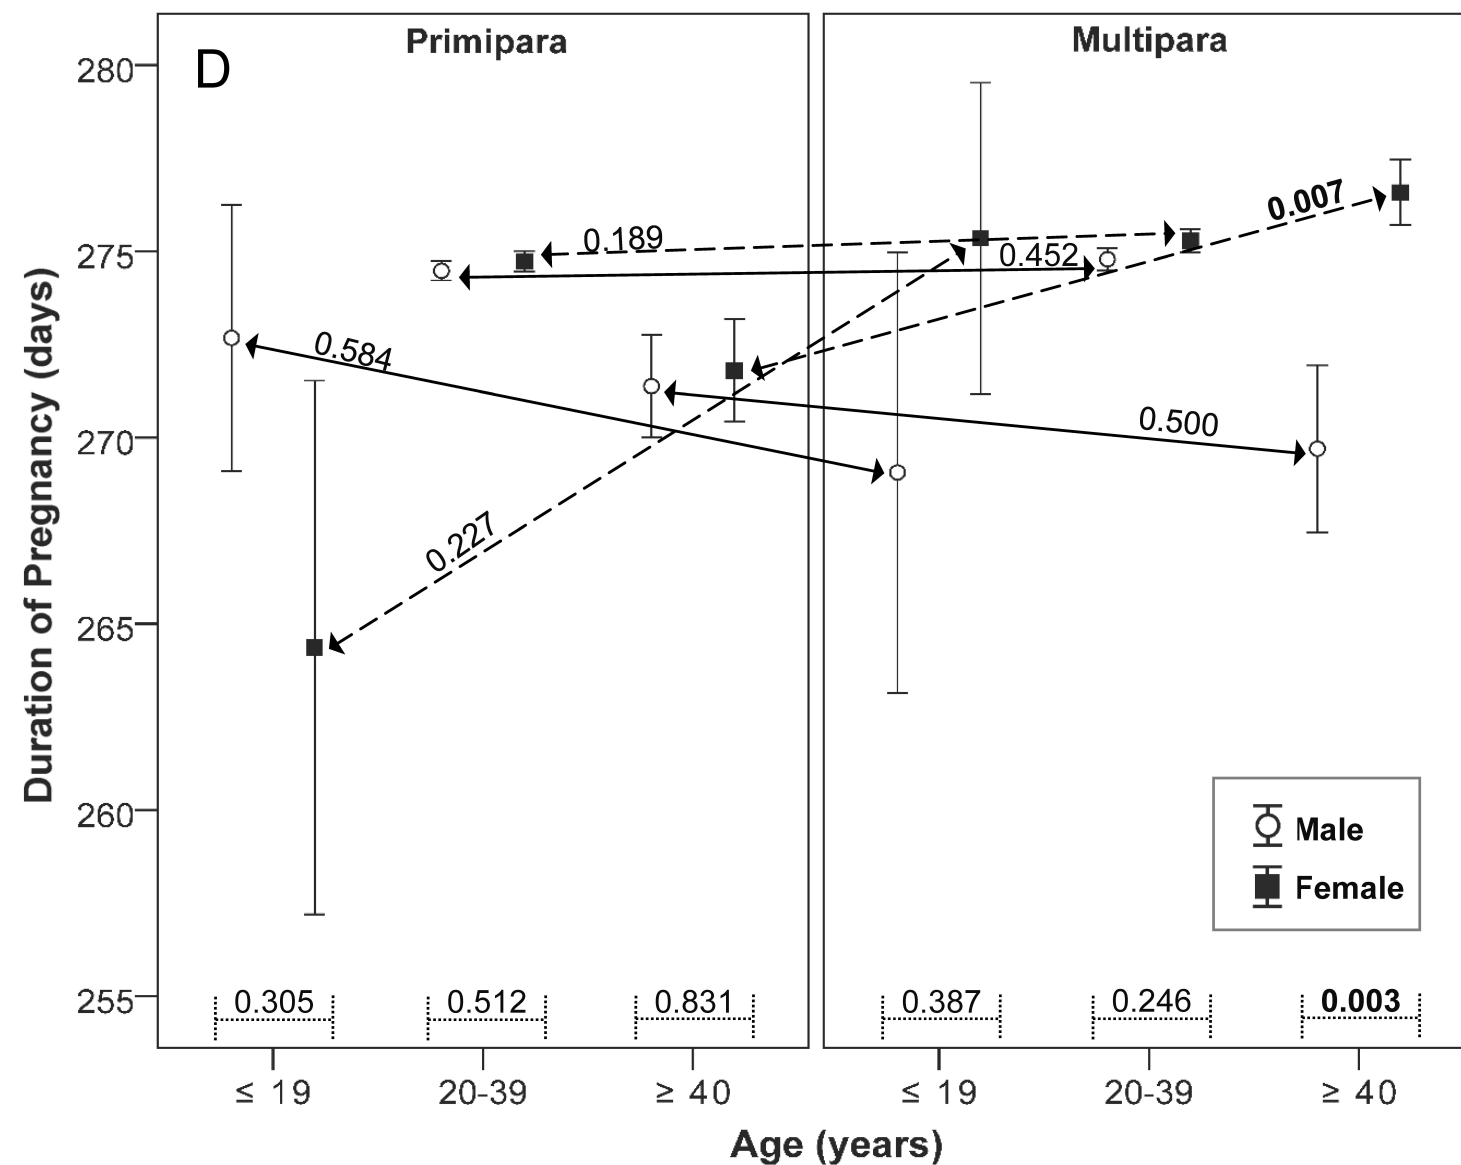

Source: https://www.biorxiv.org/content/10.1101/365502v1.full.pdf
